# Supplementary material for: Dietary Oxidative Balance Scores and Biomarkers of Inflammation among Individuals with and without Chronic Kidney Disease
Source: PubMed Central journal article supplement — Nephron Extra. 2018 Aug 21;8(2):11–23. doi: 10.1159/000490499 (PMC6158582; doi:10.1159/000490499), 2018-08-21
Supplement: nne-0008-0011-s01.pdf [file nne-0008-0011-s01.pdf]

**Table S1.** Spearman correlation coefficients for OBS and biomarkers of inflammation (IL-6, IL-8, IL-10, fibrinogen, CRP, WBC count, and Cys C), and between biomarkers of inflammation in the REGARDS cohort weighted random sample.

|                      | <b>OBS</b><br>Corr.<br>p-value | <b>IL-6</b><br>Corr.<br>p-value | <b>IL-8</b><br>Corr.<br>p-value | <b>IL-10</b><br>Corr.<br>p-value | <b>Fibrin-<br/>ogen</b><br>Corr.<br>p-value | <b>CRP</b><br>Corr.<br>p-value | <b>WBC<br/>count</b><br>Corr.<br>p-value | <b>Cys C</b><br>Corr.<br>p-value |
|----------------------|--------------------------------|---------------------------------|---------------------------------|----------------------------------|---------------------------------------------|--------------------------------|------------------------------------------|----------------------------------|
| <b>OBS</b>           | --                             |                                 |                                 |                                  |                                             |                                |                                          |                                  |
| <b>IL-6</b>          | -0.08<br>0.04                  | --                              |                                 |                                  |                                             |                                |                                          |                                  |
| <b>IL-8</b>          | -0.01<br>0.9                   | 0.23<br><0.001                  | --                              |                                  |                                             |                                |                                          |                                  |
| <b>IL-10</b>         | 0.00<br>0.9                    | 0.19<br><0.001                  | 0.18<br><0.001                  | --                               |                                             |                                |                                          |                                  |
| <b>Fibrinogen</b>    | -0.03<br>0.5                   | 0.42<br><0.001                  | 0.06<br>0.2                     | -0.01<br>0.8                     | --                                          |                                |                                          |                                  |
| <b>CRP</b>           | -0.09<br>0.02                  | 0.50<br><0.001                  | 0.04<br>0.3                     | 0.02<br>0.5                      | 0.51<br><0.001                              | --                             |                                          |                                  |
| <b>WBC<br/>count</b> | -0.06<br>0.2                   | 0.25<br><0.001                  | 0.01<br>0.9                     | 0.06<br>0.2                      | 0.20<br><0.001                              | 0.24<br><0.001                 | --                                       |                                  |
| <b>Cys C</b>         | 0.01<br>0.7                    | 0.41<br><0.001                  | 0.21<br><0.001                  | 0.21<br><0.001                   | 0.22<br><0.001                              | 0.20<br><0.001                 | 0.17<br><0.001                           | --                               |

OBS oxidative balance score; IL Interleukin; CRP C-reactive protein; WBC white blood cell; Cys C Cystatin C; Corr. correlation

**Table S2.** Unadjusted models showing the association between OBS (continuous and interval) and biomarkers of inflammation<sup>a</sup> in the REGARDS cohort weighted random sample (N=682).

|                         | <b>IL-6</b> | <b>IL-8</b> | <b>IL-10</b> | <b>Fibrinogen</b> | <b>CRP</b>   | <b>WBC<br/>count</b> | <b>Cys C</b> |
|-------------------------|-------------|-------------|--------------|-------------------|--------------|----------------------|--------------|
| OBS <sup>b</sup>        | -11.7       | -2.9        | 2.7          | -1.7              | -20.5        | -2.8                 | -0.7         |
| 95% CI                  | -17.0, -6.2 | -8.6, 3.3   | -6.8, 13.0   | -4.2, 0.9         | -29.8, -9.9  | -6.6, 1.0            | -3.2, 2.0    |
| p-value                 | <0.001      | 0.4         | 0.6          | 0.2               | <0.001       | 0.2                  | 0.5          |
| <b>OBS</b>              |             |             |              |                   |              |                      |              |
| Interval 1 <sup>c</sup> | --          | --          | --           | --                | --           | --                   | --           |
| Interval 2 <sup>c</sup> | -3.9        | 3.1         | 35.5         | 1.9               | -44.6 *      | -14.1                | 1.3          |
| 95% CI                  | -26.0, 24.7 | -20.7, 34.1 | -10.1, 104.3 | -8.8, 13.9        | -67.7, -5.2  | -26.4, 0.3           | -9.5, 13.4   |
| Interval 3 <sup>c</sup> | -15.0       | -0.5        | 47.5         | -2.7              | -50.9 *      | -17.1 *              | 0.5          |
| 95% CI                  | -34.0, 9.6  | -23.0, 28.5 | -1.1, 120.0  | -12.6, 8.5        | -70.9, -17.1 | -28.7, -3.6          | -10.0, 12.1  |
| Interval 4 <sup>c</sup> | -22.0       | 2.8         | 32.5         | -3.3              | -58.6 *      | -14.2                | -0.1         |
| 95% CI                  | -39.7, 0.9  | -20.7, 33.3 | -11.6, 98.7  | -13.3, 7.9        | -75.7, -29.7 | -26.4, 0.0           | -10.6, 11.6  |
| Interval 5 <sup>c</sup> | -27.6 *     | -12.0       | 44.6         | 0.2               | -57.1 *      | -20.9 *              | -4.6         |
| 95% CI                  | -47.0, -1.3 | -35.6, 20.4 | -11.3, 135.7 | -12.1, 14.3       | -77.3, -19.0 | -34.4, -4.5          | -16.5, 9.0   |
| p-trend                 | <0.001      | 0.6         | 0.7          | 0.2               | 0.001        | 0.2                  | 0.3          |

OBS oxidative balance score; IL Interleukin; CRP C-reactive protein; WBC white blood cell; Cys C Cystatin C; CI confidence interval

<sup>a</sup> Natural log transformed

<sup>b</sup> Estimates represent percent difference per 5-unit change in OBS

<sup>c</sup> Interval 1: OBS 0-5; Interval 2: OBS 6-9; Interval 3: OBS 10-13; Interval 4: OBS 14-17; and Interval 5: OBS 18-22

\* p-value <0.05 for interval

**Table S3.** Unadjusted models showing the association between OBS and biomarkers of inflammation<sup>a</sup>, stratified by CKD<sup>b</sup>, in the REGARDS cohort weighted random sample (N=682).

|                                  | <b>IL-6</b> | <b>IL-8</b>  | <b>IL-10</b> | <b>Fibrinogen</b> | <b>CRP</b>   | <b>WBC count</b> | <b>Cys C</b> |
|----------------------------------|-------------|--------------|--------------|-------------------|--------------|------------------|--------------|
| Interaction p-value <sup>c</sup> | <0.001      | 0.2          | 0.07         | 0.001             | 0.02         | 0.8              | <0.001       |
| <b>CKD (n=153)</b>               |             |              |              |                   |              |                  |              |
| OBS <sup>d</sup>                 | -0.1        | 6.6          | -11.6        | 2.2               | 3.0          | 1.1              | 2.7          |
| 95% CI                           | -11.7, 13.1 | -4.9, 19.5   | -31.2, 13.6  | -2.9, 7.7         | -18.6, 30.3  | -8.2, 11.3       | -5.0, 11.1   |
| p-value                          | 0.9         | 0.3          | 0.3          | 0.4               | 0.8          | 0.8              | 0.5          |
| <b>OBS</b>                       |             |              |              |                   |              |                  |              |
| Interval 1 <sup>e</sup>          | --          | --           | --           | --                | --           | --               | --           |
| Interval 2 <sup>e</sup>          | -16.6       | 1.5          | -8.5         | -10.6             | -41.9        | -13.1            | -30.1        |
| 95% CI                           | -53.8, 50.8 | -41.1, 74.8  | -72.0, 198.5 | -29.7, 13.8       | -81.0, 77.4  | -40.8, 27.6      | -51.7, 1.0   |
| Interval 3 <sup>e</sup>          | -20.5       | 1.5          | 32.9         | -11.4             | -46.0        | -24.7            | -26.3        |
| 95% CI                           | -55.5, 41.9 | -40.3, 72.5  | -58.1, 321.4 | -30.0, 12.0       | -81.8, 60.4  | -47.9, 8.8       | -48.6, 5.6   |
| Interval 4 <sup>e</sup>          | -26.1       | 13.5         | -11.8        | -11.3             | -47.2        | -7.2             | -22.7        |
| 95% CI                           | -58.7, 32.1 | -33.4, 93.4  | -72.4, 181.2 | -30.0, 12.3       | -82.3, 57.8  | -36.2, 34.8      | -46.2, 11.0  |
| Interval 5 <sup>e</sup>          | -0.8        | 24.8         | -14.1        | 8.9               | -20.2        | -18.5            | -27.6        |
| 95% CI                           | -50.5, 98.9 | -34.6, 138.0 | -78.9, 249.8 | -18.1, 44.9       | -78.8, 200.5 | -49.1, 30.7      | -53.3, 12.2  |
| p for trend                      | 0.5         | 0.2          | 0.5          | 0.6               | 0.7          | 0.6              | 0.7          |
| <b>No CKD (n=529)</b>            |             |              |              |                   |              |                  |              |
| OBS <sup>d</sup>                 | -14.5       | -5.1         | 5.2          | -2.7              | -25.1        | -3.8             | -2.0         |
| 95% CI                           | -20.2, -8.5 | -11.5, 1.9   | -5.1, 16.6   | -5.5, 0.2         | -35.2, -13.6 | -7.9, 0.4        | -4.2, 0.2    |
| p-value                          | <0.001      | 0.2          | 0.3          | 0.06              | <0.001       | 0.07             | 0.07         |
| <b>OBS</b>                       |             |              |              |                   |              |                  |              |
| Interval 1 <sup>e</sup>          | --          | --           | --           | --                | --           | --               | --           |
| Interval 2 <sup>e</sup>          | -2.6        | 3.2          | 43.6         | 3.9               | -45.4        | -14.1            | 6.8          |
| 95% CI                           | -26.9, 29.6 | -23.4, 39.0  | -6.6, 121.0  | -8.2, 17.5        | -70.3, 0.4   | -27.4, 1.7       | -2.7, 17.2   |
| Interval 3 <sup>e</sup>          | -15.3       | -1.4         | 46.1         | -1.7              | -52.3 *      | -15.4 *          | 3.9          |
| 95% CI                           | -35.9, 12.0 | -26.3, 31.9  | -4.0, 122.3  | -12.9, 10.9       | -73.7, -13.6 | -28.2, -0.3      | -5.1, 13.8   |
| Interval 4 <sup>e</sup>          | -23.4       | -0.4         | 40.1         | -2.7              | -61.6 *      | -16.1 *          | 3.9          |
| 95% CI                           | -42.3, 1.6  | -25.8, 33.8  | -8.5, 114.6  | -13.9, 9.9        | -79.0, -29.9 | -29.0, -0.8      | -7.7, 10.9   |
| Interval 5 <sup>e</sup>          | -32.3 *     | -17.2        | 57.2         | -1.3              | -61.3 *      | -21.2 *          | -0.5         |
| 95% CI                           | -51.9, -4.7 | -41.9, 18.2  | -5.9, 162.4  | -14.6, 14.2       | -81.2, -20.6 | -35.7, -3.4      | -10.8, 11.0  |
| p-trend                          | <0.001      | 0.3          | 0.5          | 0.09              | 0.001        | 0.08             | 0.03         |

OBS oxidative balance score; IL Interleukin; CRP C-reactive protein; WBC white blood cell; Cys C Cystatin C; CKD chronic kidney disease; CI confidence interval

<sup>a</sup> Natural log transformed

<sup>b</sup> CKD at baseline was defined as eGFR<60 ml/min/1.73m<sup>2</sup> or albuminuria ≥30 mg/g

<sup>c</sup> p-value for interaction based on continuous OBS

<sup>d</sup> Estimates represent percent difference per 5-unit change in OBS

<sup>e</sup> Interval 1: OBS 0-5; Interval 2: OBS 6-9; Interval 3: OBS 10-13; Interval 4: OBS 14-17; and Interval 5: OBS 18-22

\* p-value <0.05 for interval
